# Supplementary material for: Three historic tide gauge records from Svalbard
Source: Copernicus journal article supplement (doi:10.5194/hgss-17-1-2026), 2026-01-16
Supplement: Supplementary file [file hgss-17-1-2026-supplement-title-page.pdf › hgss-17-1-2026-supplement-title-page.pdf]

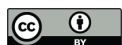

## *Supplement of*

# **Three historic tide gauge records from Svalbard**

**Philip L. Woodworth and Thorkild Aarup**

*Correspondence to:* Philip L. Woodworth (plw@noc.ac.uk)

- hgss-17-1-2026-supplement-title-page.pdf
- data\_baie\_de\_treurenberg
- data\_portvirgo
- data\_wijkander1
- data\_wijkander2
- smfigs.pdf

The copyright of individual parts of the supplement might differ from the article licence.
